# Supplementary material for: Novel functionalization of ZIF-67 for an efficient broad-spectrum photocatalyst: formaldehyde degradation at room temperature
Source: Royal Society of Chemistry journal article supplement (doi:10.1039/d1nj06192e), 2022-01-01
Supplement: d1nj06192e1.pdf [file d1nj06192e1.pdf]

**Supporting information:**

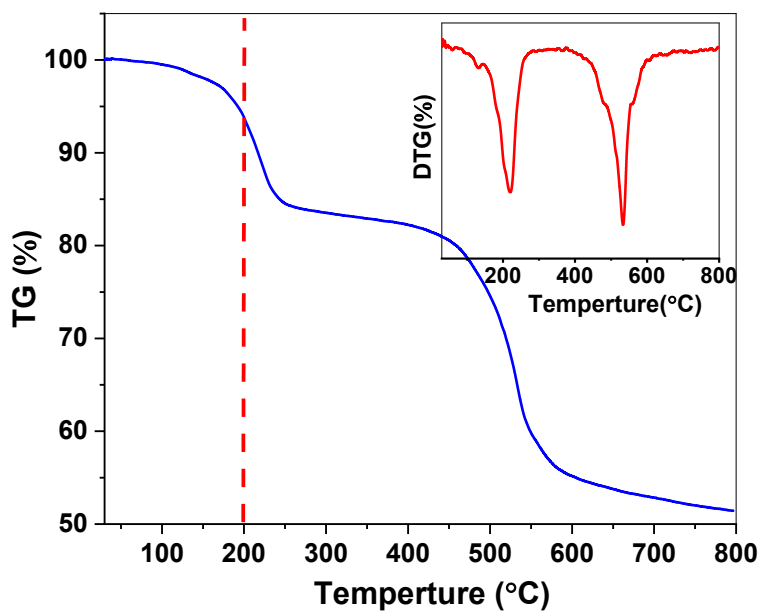

**Fig. S1.** TGA and DTG (insert) curves of ZIF-67.

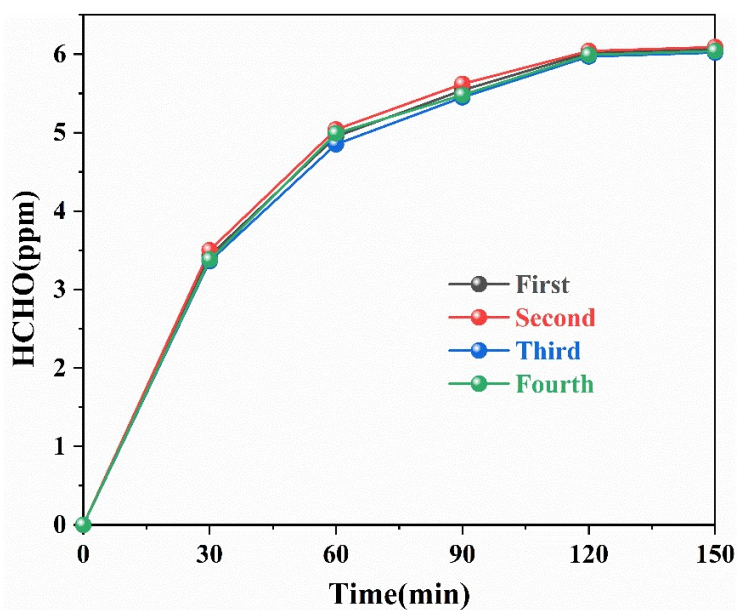

**Fig. S2.** Volatilization of HCHO without photocatalysts in dark. (10  $\mu$ l HCHO solution volatilized to a maximum concentration of 6 ppm by 120 min in the dark.)

**Table S1**

Comparison of the light absorption band of the recently reported visible-light photocatalysts and ZIF-67-F3.

| Photocatalyst                                          | Visible light absorption band (nm) | Ref.      |
|--------------------------------------------------------|------------------------------------|-----------|
| BiVO <sub>4</sub> /GQD/g-C <sub>3</sub> N <sub>4</sub> | 400-530                            | (1)       |
| ZnO/Au/g-C <sub>3</sub> N <sub>4</sub>                 | 460-600                            | (2)       |
| Ag <sub>3</sub> PO <sub>4</sub> /TiO <sub>2</sub> @ MS | 500-600                            | (3)       |
| ZIF-8/g-C <sub>3</sub> N <sub>4</sub>                  | 400-480                            | (4)       |
| C@ZnO                                                  | 400-700                            | (5)       |
| BNQDs/MIL-100(Fe)                                      | 400-700                            | (6)       |
| Ag <sub>2</sub> O/ZnO/CuO                              | 400-720                            | (7)       |
| ZIF-67-F3                                              | 400-780                            | This work |

## References

1. Samsudin MFR, Ullah H, Tahir AA, Li X, Ng YH, Sufian S. Superior photoelectrocatalytic performance of ternary structural BiVO<sub>4</sub>/GQD/g-C<sub>3</sub>N<sub>4</sub> heterojunction. *J Colloid Interface Sci.* 2021;586:785-96.
2. Li X, Jiang H, Ma C, Zhu Z, Song X, Wang H, et al. Local surface plasma resonance effect enhanced Z-scheme ZnO/Au/g-C<sub>3</sub>N<sub>4</sub> film photocatalyst for reduction of CO<sub>2</sub> to CO. *Applied Catalysis B: Environmental.* 2021;283.
3. Bian Z, Feng Y, Li H, Zhan J. Fabrication of Ag<sub>3</sub>PO<sub>4</sub>/TiO<sub>2</sub>@molecular sieve (MS) ternary composites with remarkably enhanced visible light-responded photocatalytic activity and mechanism insight. *Environ Res.* 2020;190:109984.
4. Qiu M, Liu Z, Wang S, Hu B. The photocatalytic reduction of U(VI) into U(IV) by ZIF-8/g-C<sub>3</sub>N<sub>4</sub> composites at visible light. *Environ Res.* 2021;196:110349.
5. Zhang Y, Zhou J, Chen X, Feng Q, Cai W. MOF-derived C-doped ZnO composites for enhanced photocatalytic performance under visible light. *Journal of Alloys and Compounds.* 2019;777:109-18.
6. Zhang G, Chen S, Yang Y, Liu Y, Lei L, Liu X, et al. Boron nitride quantum dots decorated MIL-100(Fe) for boosting the photo-generated charge separation in photocatalytic refractory antibiotics removal. *Environ Res.* 2021;202:111661.
7. Salari H, Sadeghinia M. MOF-templated synthesis of nano Ag<sub>2</sub>O/ZnO/CuO heterostructure for photocatalysis. *Journal of Photochemistry and Photobiology A: Chemistry.* 2019;376:279-87.
